# Supplementary material for: Multiple Lineages of Human Breast Cancer Stem/Progenitor Cells Identified by Profiling with Stem Cell Markers
Source: PLOS journal article supplement (doi:10.1371/journal.pone.0008377), 2009-12-19

A ALDH<sup>+</sup> and CXCR4<sup>+</sup> ZR-75 cells did not overlap with each other.

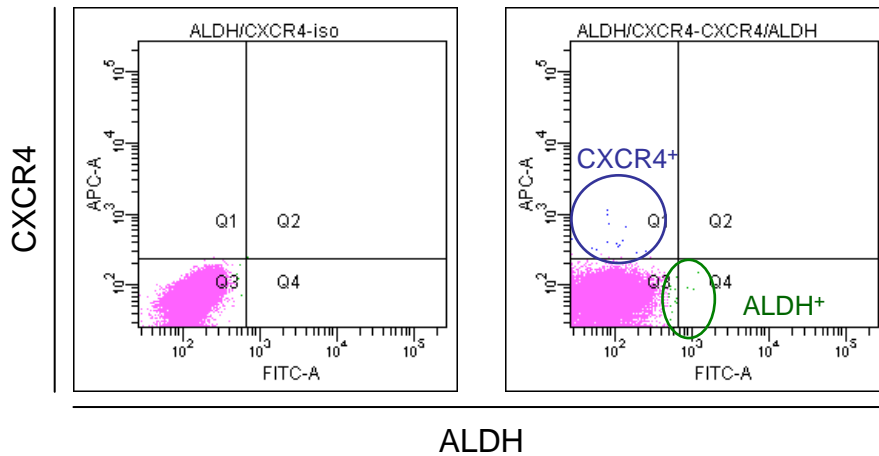

B ALDH<sup>+</sup> ZR-75 cells exhibited higher tumorigenicity than CXCR4<sup>+</sup> ZR-75 cells.

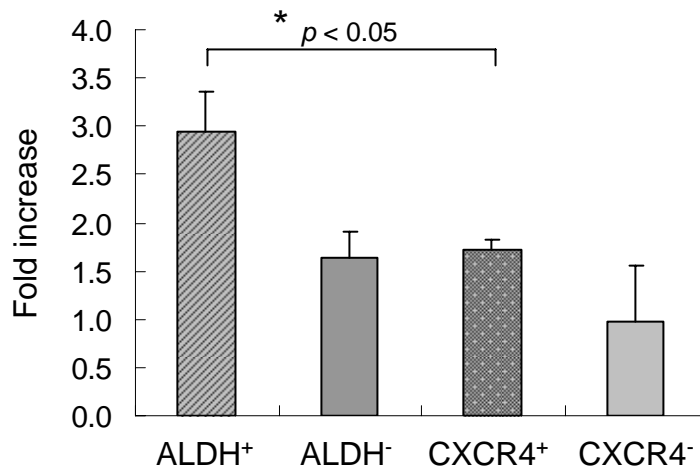

C Soft agar colony forming efficiency of ALDH<sup>+</sup> and ALDH<sup>-</sup> HCC1937 cells

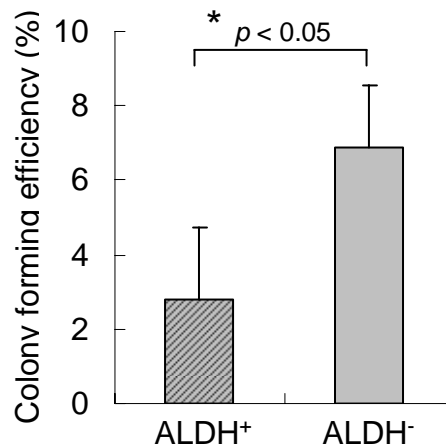

Supplement: S2 (10.1371/journal.pone.0008377.s002) [file journal.pone.0008377.s002]
