# Supplementary material for: Multiple Lineages of Human Breast Cancer Stem/Progenitor Cells Identified by Profiling with Stem Cell Markers
Source: PLOS journal article supplement (doi:10.1371/journal.pone.0008377), 2009-12-19

- A The prevalence of solid cancer stem cell markers in a human breast cancer specimen #235C.

| Marker                                   | Prevalence (%) |
|------------------------------------------|----------------|
| CD44 <sup>+</sup> /CD24 <sup>-/low</sup> | 0.5            |
| PROCR <sup>+</sup>                       | 0              |
| ESA <sup>+</sup>                         | 75.3           |
| ABCG2 <sup>+</sup>                       | 0.1            |
| CXCR4 <sup>+</sup>                       | 0.1            |
| CD133 <sup>+</sup>                       | 0              |
| ALDH <sup>+</sup>                        | 0              |

- B CD44<sup>+</sup>/CD24<sup>-/low</sup> cells from #235C exhibited higher mammosphere forming ability than other cells

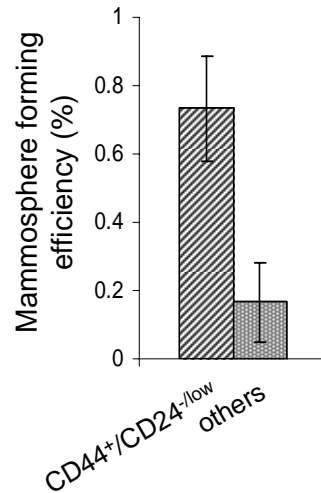

- C CD44<sup>+</sup>/CD24<sup>-/low</sup> cells from #235C exhibited higher colony forming ability than other cells

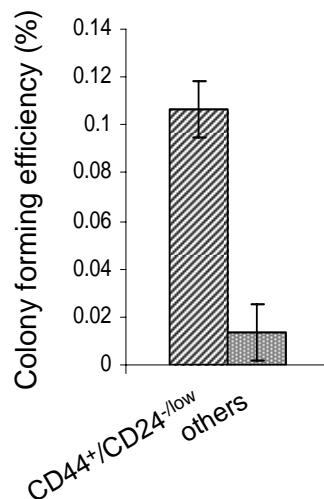

Supplement: S4 (10.1371/journal.pone.0008377.s004) [file journal.pone.0008377.s004]
